# Supplementary material
Source: publisher figshare collection journal article supplement (https://sage.figshare.com/ndownloader/files/17961635)
Supplement: Supplementary file 1 [file 17961635]

1. What party did you vote for in the national parliamentary election in 2012

- VVD
- PvdA
- PVV
- CDA
- SP
- D66
- GroenLinks
- ChristenUnie
- Staatkundig Gereformeerde Partij (SGP)
- Partij voor de Dieren (PvdD)
- Piratenpartij
- Partij voor Mens en Spirit (MenS)
- Nederland Lokaal
- Libertarische Partij (LP)
- Democratisch Politiek Keerpunt (DPK)
- 50Plus
- Liberaal Democratische Partij (LibDem)
- Anti Europa Partij
- Soeverein Onafhankelijke Pioniers Nederland (SOPN)
- Partij van de Toekomst (PvdT)
- Politieke Partij NXD
- I cannot remember what I voted for
- I did not vote
- I did not have the right to vote in 2012
- I would rather not answer

2. Did you vote during the municipal election on March 19?

- Yes
- No

3. Can you indicate in which province and municipality you live?

- Groningen
- Fryslan
- Drenthe

| Groningen | Appingedam, Bedum, Bellingwedde, De Marne, Delfzijl, Eemsmond, Groningen, Grootegast, Haren, Hoogezand-Sappemeer, Leek, Loppersum, Marum, Menterwolde, Oldambt, Pekela, Slochteren, Stadskanaal, Ten Boer, Veendam, Vlagtwedde, Winsum, Zuidhorn |
| --- | --- |
| Fryslân | Achtkarspelen, Ameland, Het Bildt, Dantumadeel, Dongeradeel, Ferwerderadeel, Franekeradeel, Harlingen, Kollumerland en Nieuwkruisland, Leeuwarderadeel, Littenseradeel, Menaldumadeel, Ooststellingwerf, Opsterland, Schiermonnikoog, Smallingerland, Súdwest-Fryslân, Terschelling, Tietjerksteradeel, Vlieland, Weststellingwerf |
| Drenthe | Aa en Hunze, Assen, Borger-Odoorn, Coevorden, De Wolden, Emmen, Hoogeveen, Meppel, |

4. What party did you vote for the in the municipal election of March 19

{A list with specific parties running in each municipality}

5. What was the main reason that you vote for [party mention in Q4]?

- I always vote for this party
- I voted for this party out of dissatisfaction with the national government
- I voted for this party out of dissatisfaction with the municipal government
- I voted for this party because it is committed to the theme that I consider most important
- I voted for this party because I agree with the municipal manifesto
- I voted for this party because I trust the people on that list the most
- I voted for this party because I feel connected to the party
- I voted for this party because I agree with the ideology of this party
- Other reasons [open]

6. What is the main reason you did not vote

- I never vote
- I did not vote out of dissatisfaction with the national government
- I did not vote out of dissatisfaction with the municipal government
- I did not vote because I did not trust the candidates running in the elections
- I did not vote because the party I feel connected to did not run in the election
- I did not vote because voting is useless
- I did not vote because everything will be ok, independent of my vote
- I did not vote because I do not know which issues are at play in my municipality
- I did not vote due to circumstances
- I was not allowed to vote
- Other reasons [open]

7. How much trust do you have in the following parties

[vertical axis: all parties running in the municipality]

[horizontal axis: no trust (1) (2) (3) a lot of trust (4) I do not know]

8. How much trust do you have in ….

[vertical axis: national government, province, municipality, Dutch Oil Company, ING Bank, Unilever]

[horizontal axis: no trust (1) (2) (3) a lot of faith (4) I do not know]

9. Below there are number of statements. Could you indicate to what extent you agree with them?

[vertical axis:

- The National Government represents my interests and those of others in my municipality
- The National Government represents my wishes and those of others in my municipality
- The municipal politicians represent my interests and those of others in my municipality
- The municipal politicians represent my wishes and those of others in my municipality
- Members of Parliament care for people like me.
- Municipal councilors care for people like me.
- Politicians are only interested in my vote and not in my opinion
- Politicians do not realize the results of their decisions for people like me.]

[Horizontal axis: completely disagree, disagree, agree, completely agree, no opinion].

10. Below there are number of statements. Could you indicate to what extent you agree with them?

[Vertical axis:

- The government in The Hague has done its job well in the last period
- The government in my municipality has done its job well in the last period
- The government in my province has done its job well in the last period]

[Horizontal axis: completely disagree, disagree, agree, completely agree, no opinion].

11. Below there are number of statements. Could you indicate to what extent you agree with them?

[Vertical axis:

- By voting I can influence the policy of the national government
- It does not matter whom I vote for, it does not influence the national government.
- By voting I can influence the policy of the municipality.
- It does not matter whom I vote for, it does not influence the municipality.]

[Horizontal axis: completely disagree, disagree, agree, completely agree, no opinion]

12. Below there are number of statements. Could you indicate to what extent you agree with them?

[Vertical axis:

- The way the national government operates goes in against my values and convictions.
- The way the municipality operates goes in against my values and convictions.
- I have a good idea of the main political problems in the Netherlands
- I am interested in political issues ]

[Horizontal axis: completely disagree, disagree, agree, completely agree, no opinion]

13 Can you indicate to what extent you identify as Dutch or as [provincial demonym]?

- I only feel Dutch
- I feel more Dutch than [provincial demonym]
- I feel equally Dutch and [provincial demonym]
- I feel more [provincial demonym] than Dutch
- I only feel [provincial demonym]

14. In the last year there have been a number of earthquakes in the North of the Netherlands. Did you know this?

- Yes
- No

15. Do you follow the news concerning earthquakes in the North of the Netherlands

- Not
- A little
- Largely
- Intensively

16. Have you felt an earthquake in your habitat in the last year?

- No
- Yes, once
- Yes, multiple times

17. Has your house been damaged due tan earthquake in the least year?

18. In the last months there have been many actions against the extraction of gas. Can you indicate to what extent you agree with this statement? I support the actions and demonstrations against gas extraction.

- Completely disagree
- Disagree
- Agree
- Completely agree

19. The North of the Netherlands has been in the news, including due to the earthquakes in the region. What do you feel when you think about the state of the region?

- Unrest
- Stress
- Ambivalence
- Powerlessness
- Fear
- Anger
- Indignant
